# Supplementary material for: Dynamic survival risk prognostic model and Genomic Landscape for Atypical teratoid/rhabdoid tumor: A Population-Based, Real-World Study
Source: Preprints.org preprint supplement (doi:10.20944/preprints202401.0868.v1), 2024-01-11
Supplement: Supplementary file 1 [file supplementary]

Supplementary Material


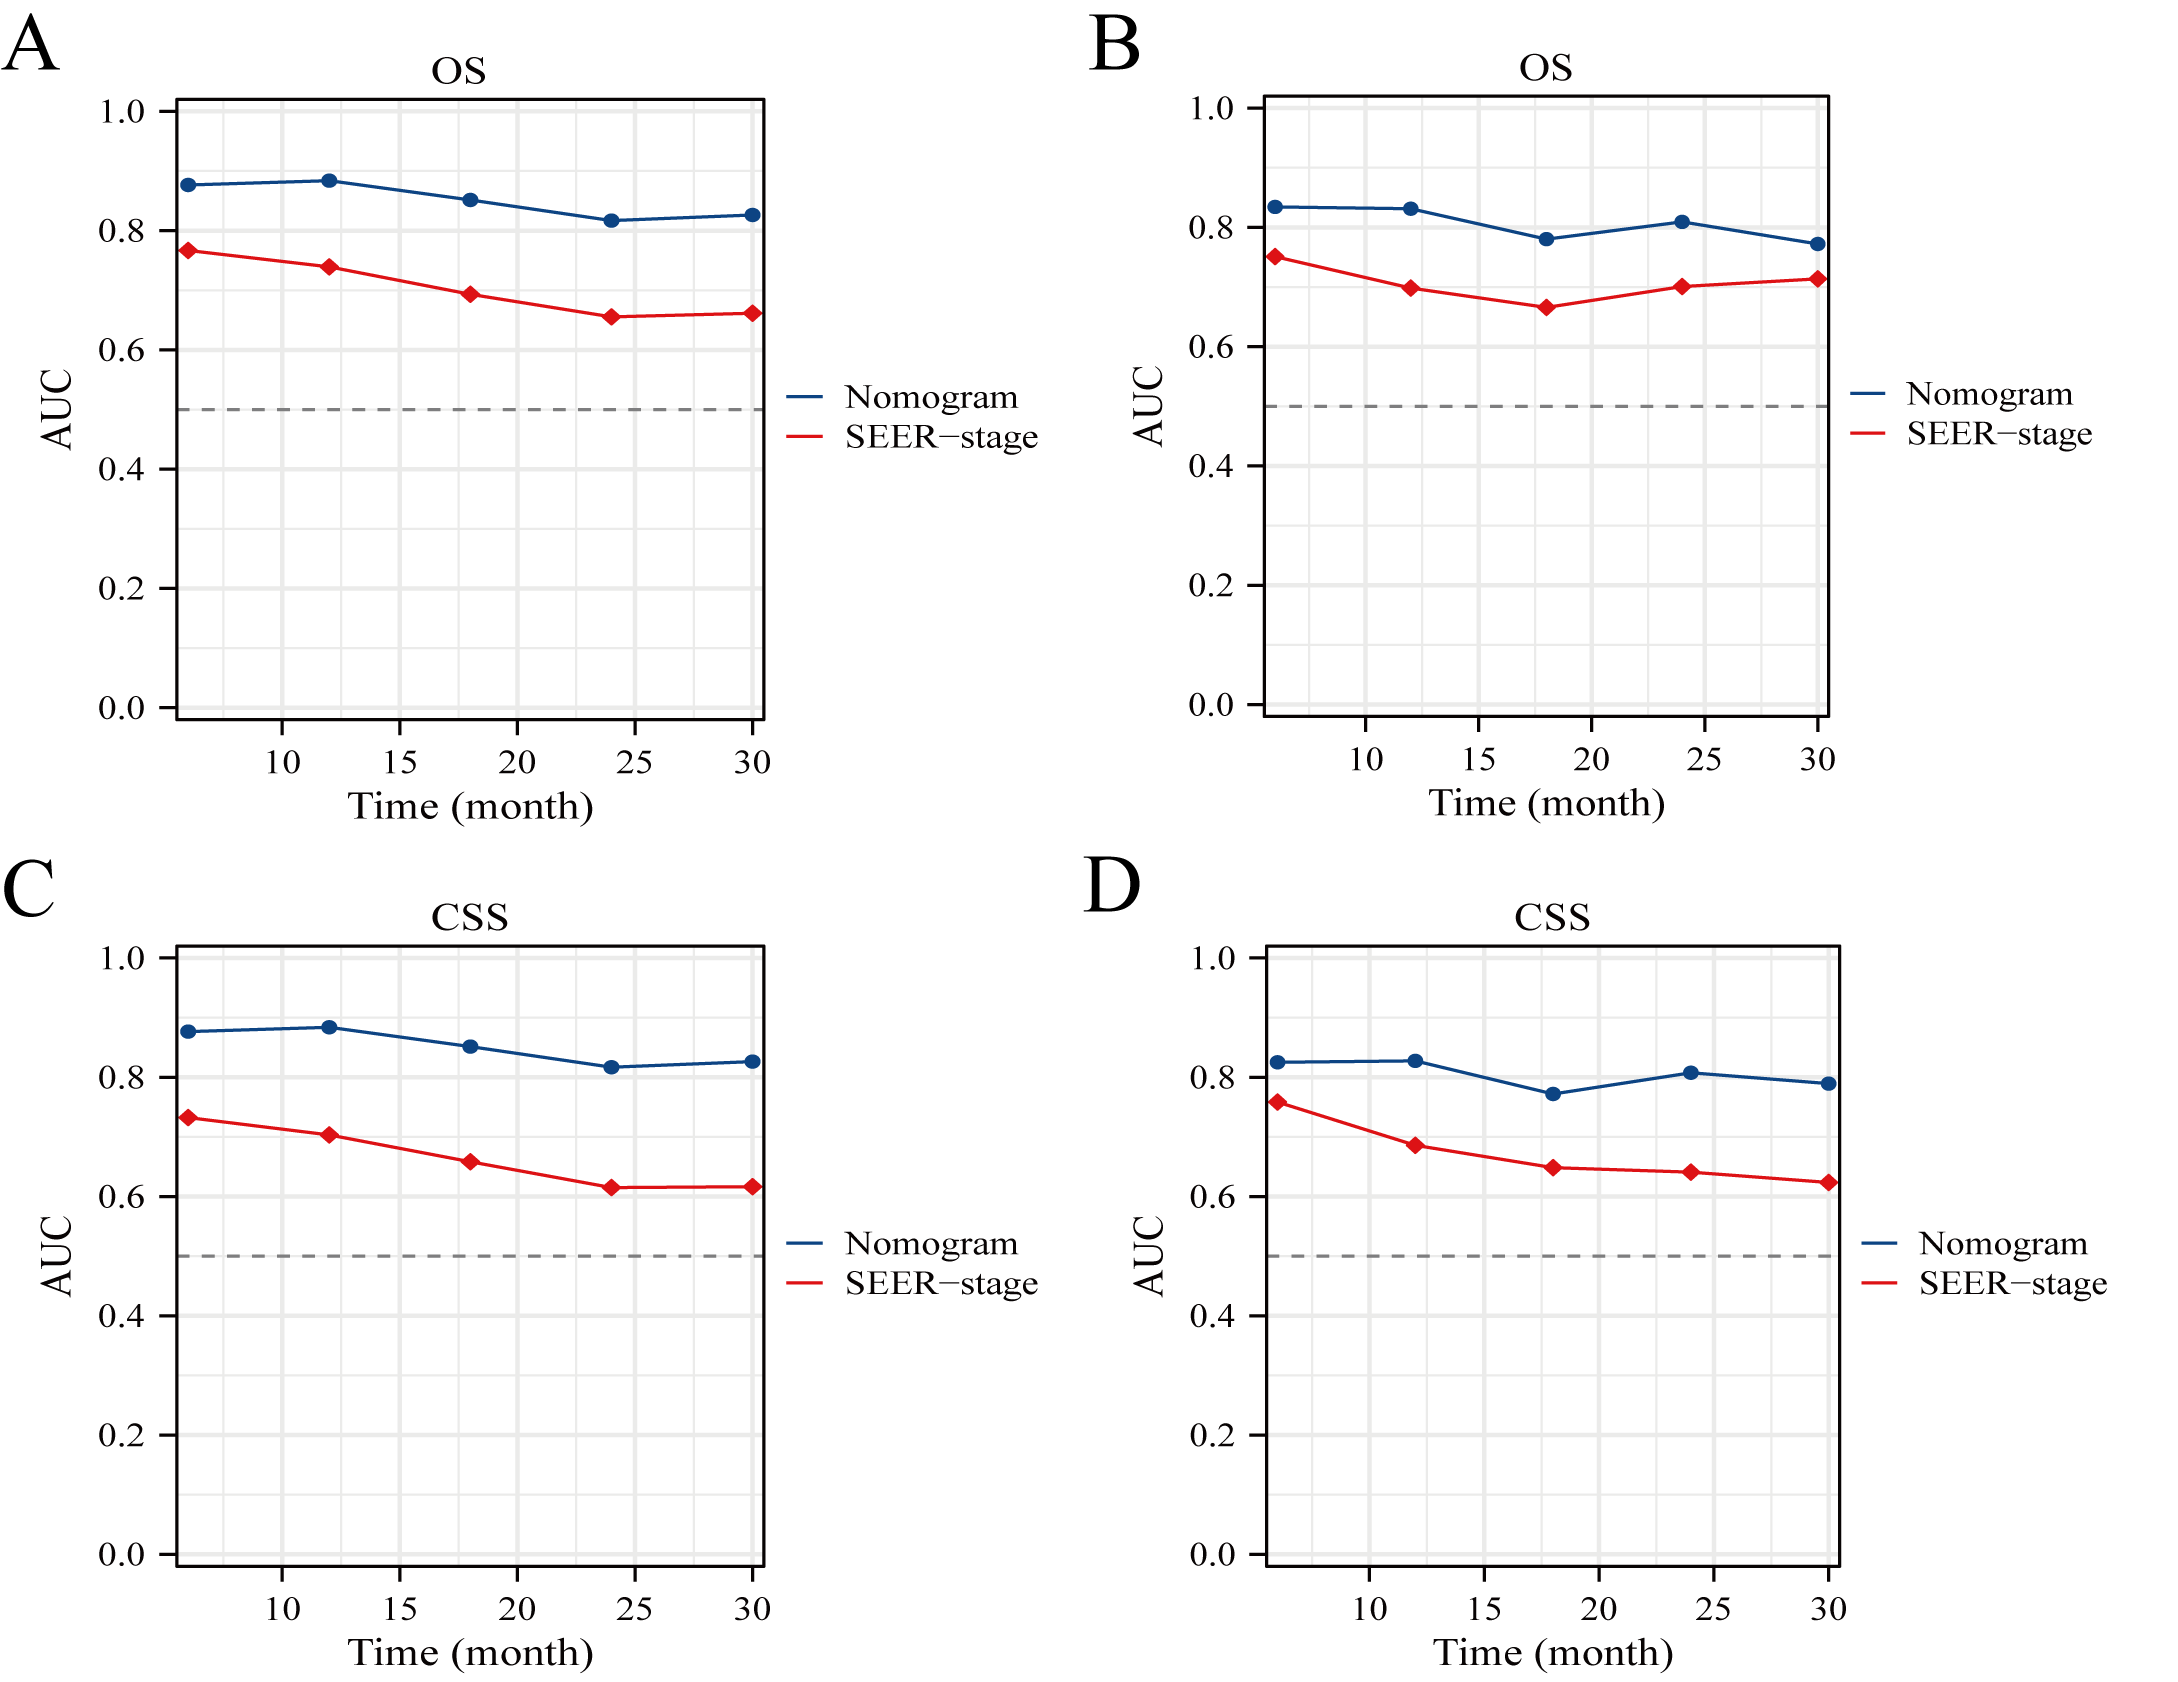


Supplementary Figure 1. Time-dependent ROC curves comparing the use of the Nomogram and SEER-stage system to predict the 1-, 2- and 3-year OS and CSS in the training cohort (A,C), the internal validation cohort (B,D).


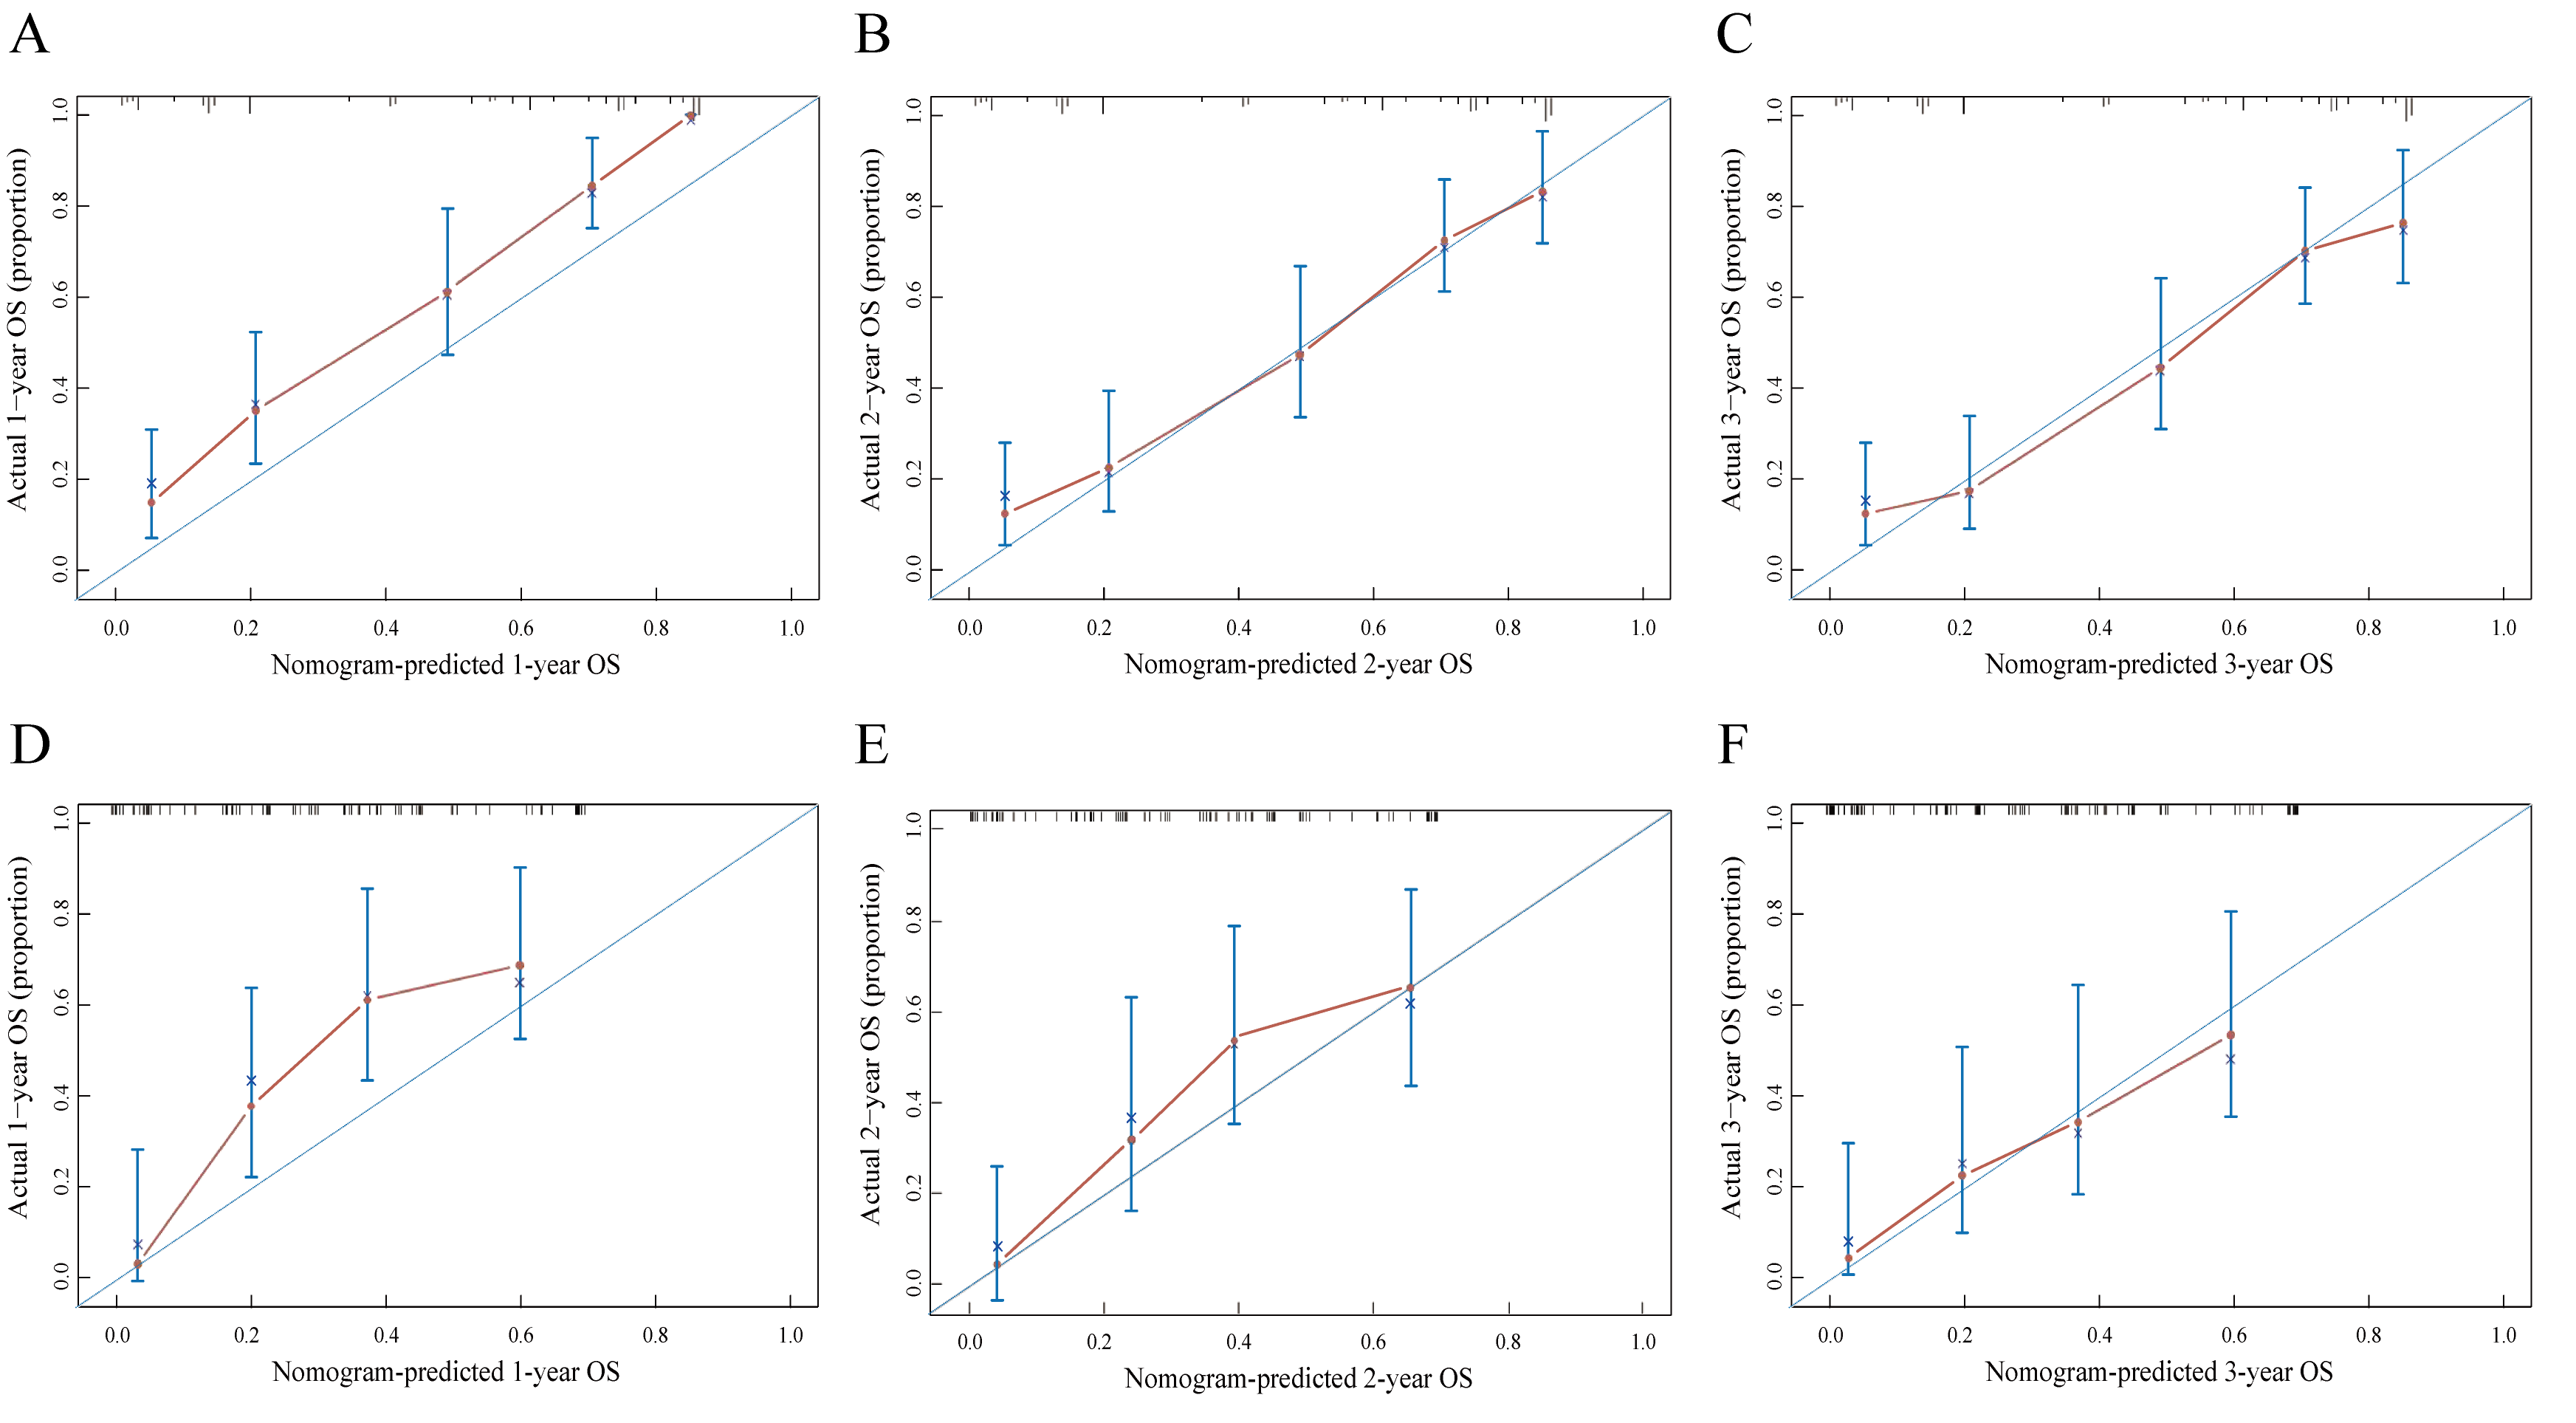


Supplementary Figure 2. The calibration curves predicting 1-year (A,D), 2-year (B,E), and 3-year (C,F) OS in training group and validation group.


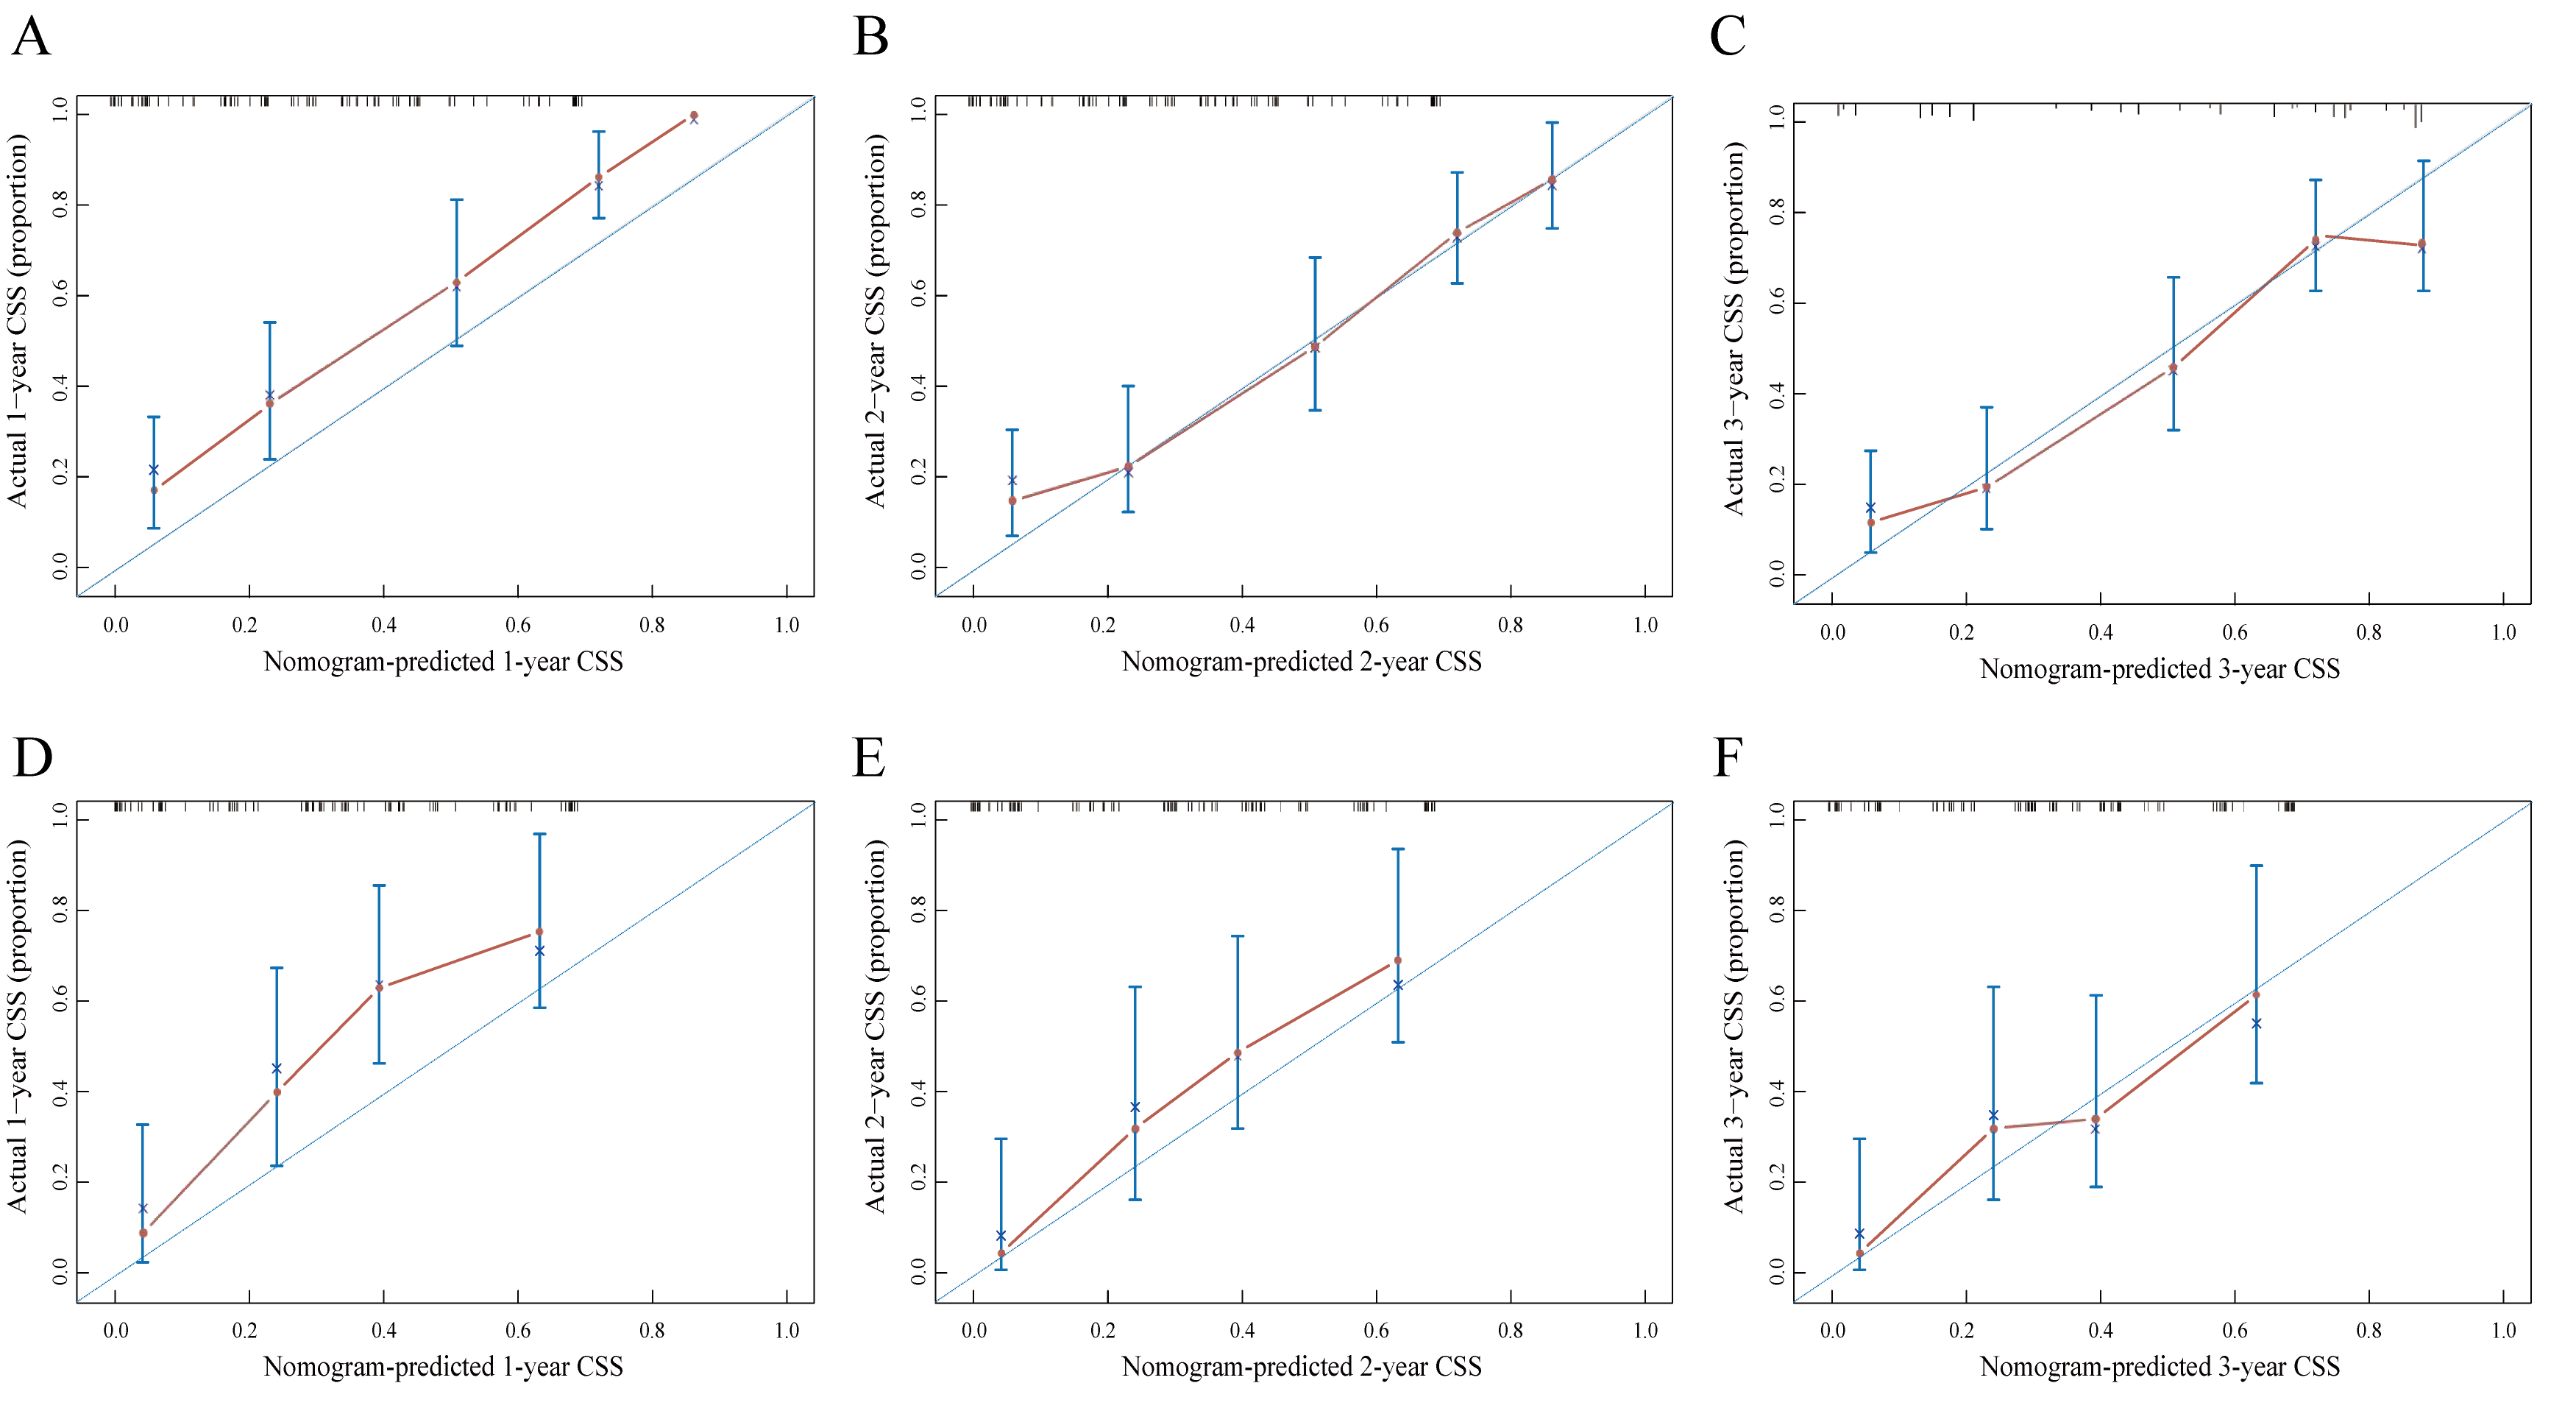


Supplementary Figure 3. The calibration curves predicting 1-year (A,D), 2-year (B,E), and 3-year (C,F) CSS in training group and validation group.


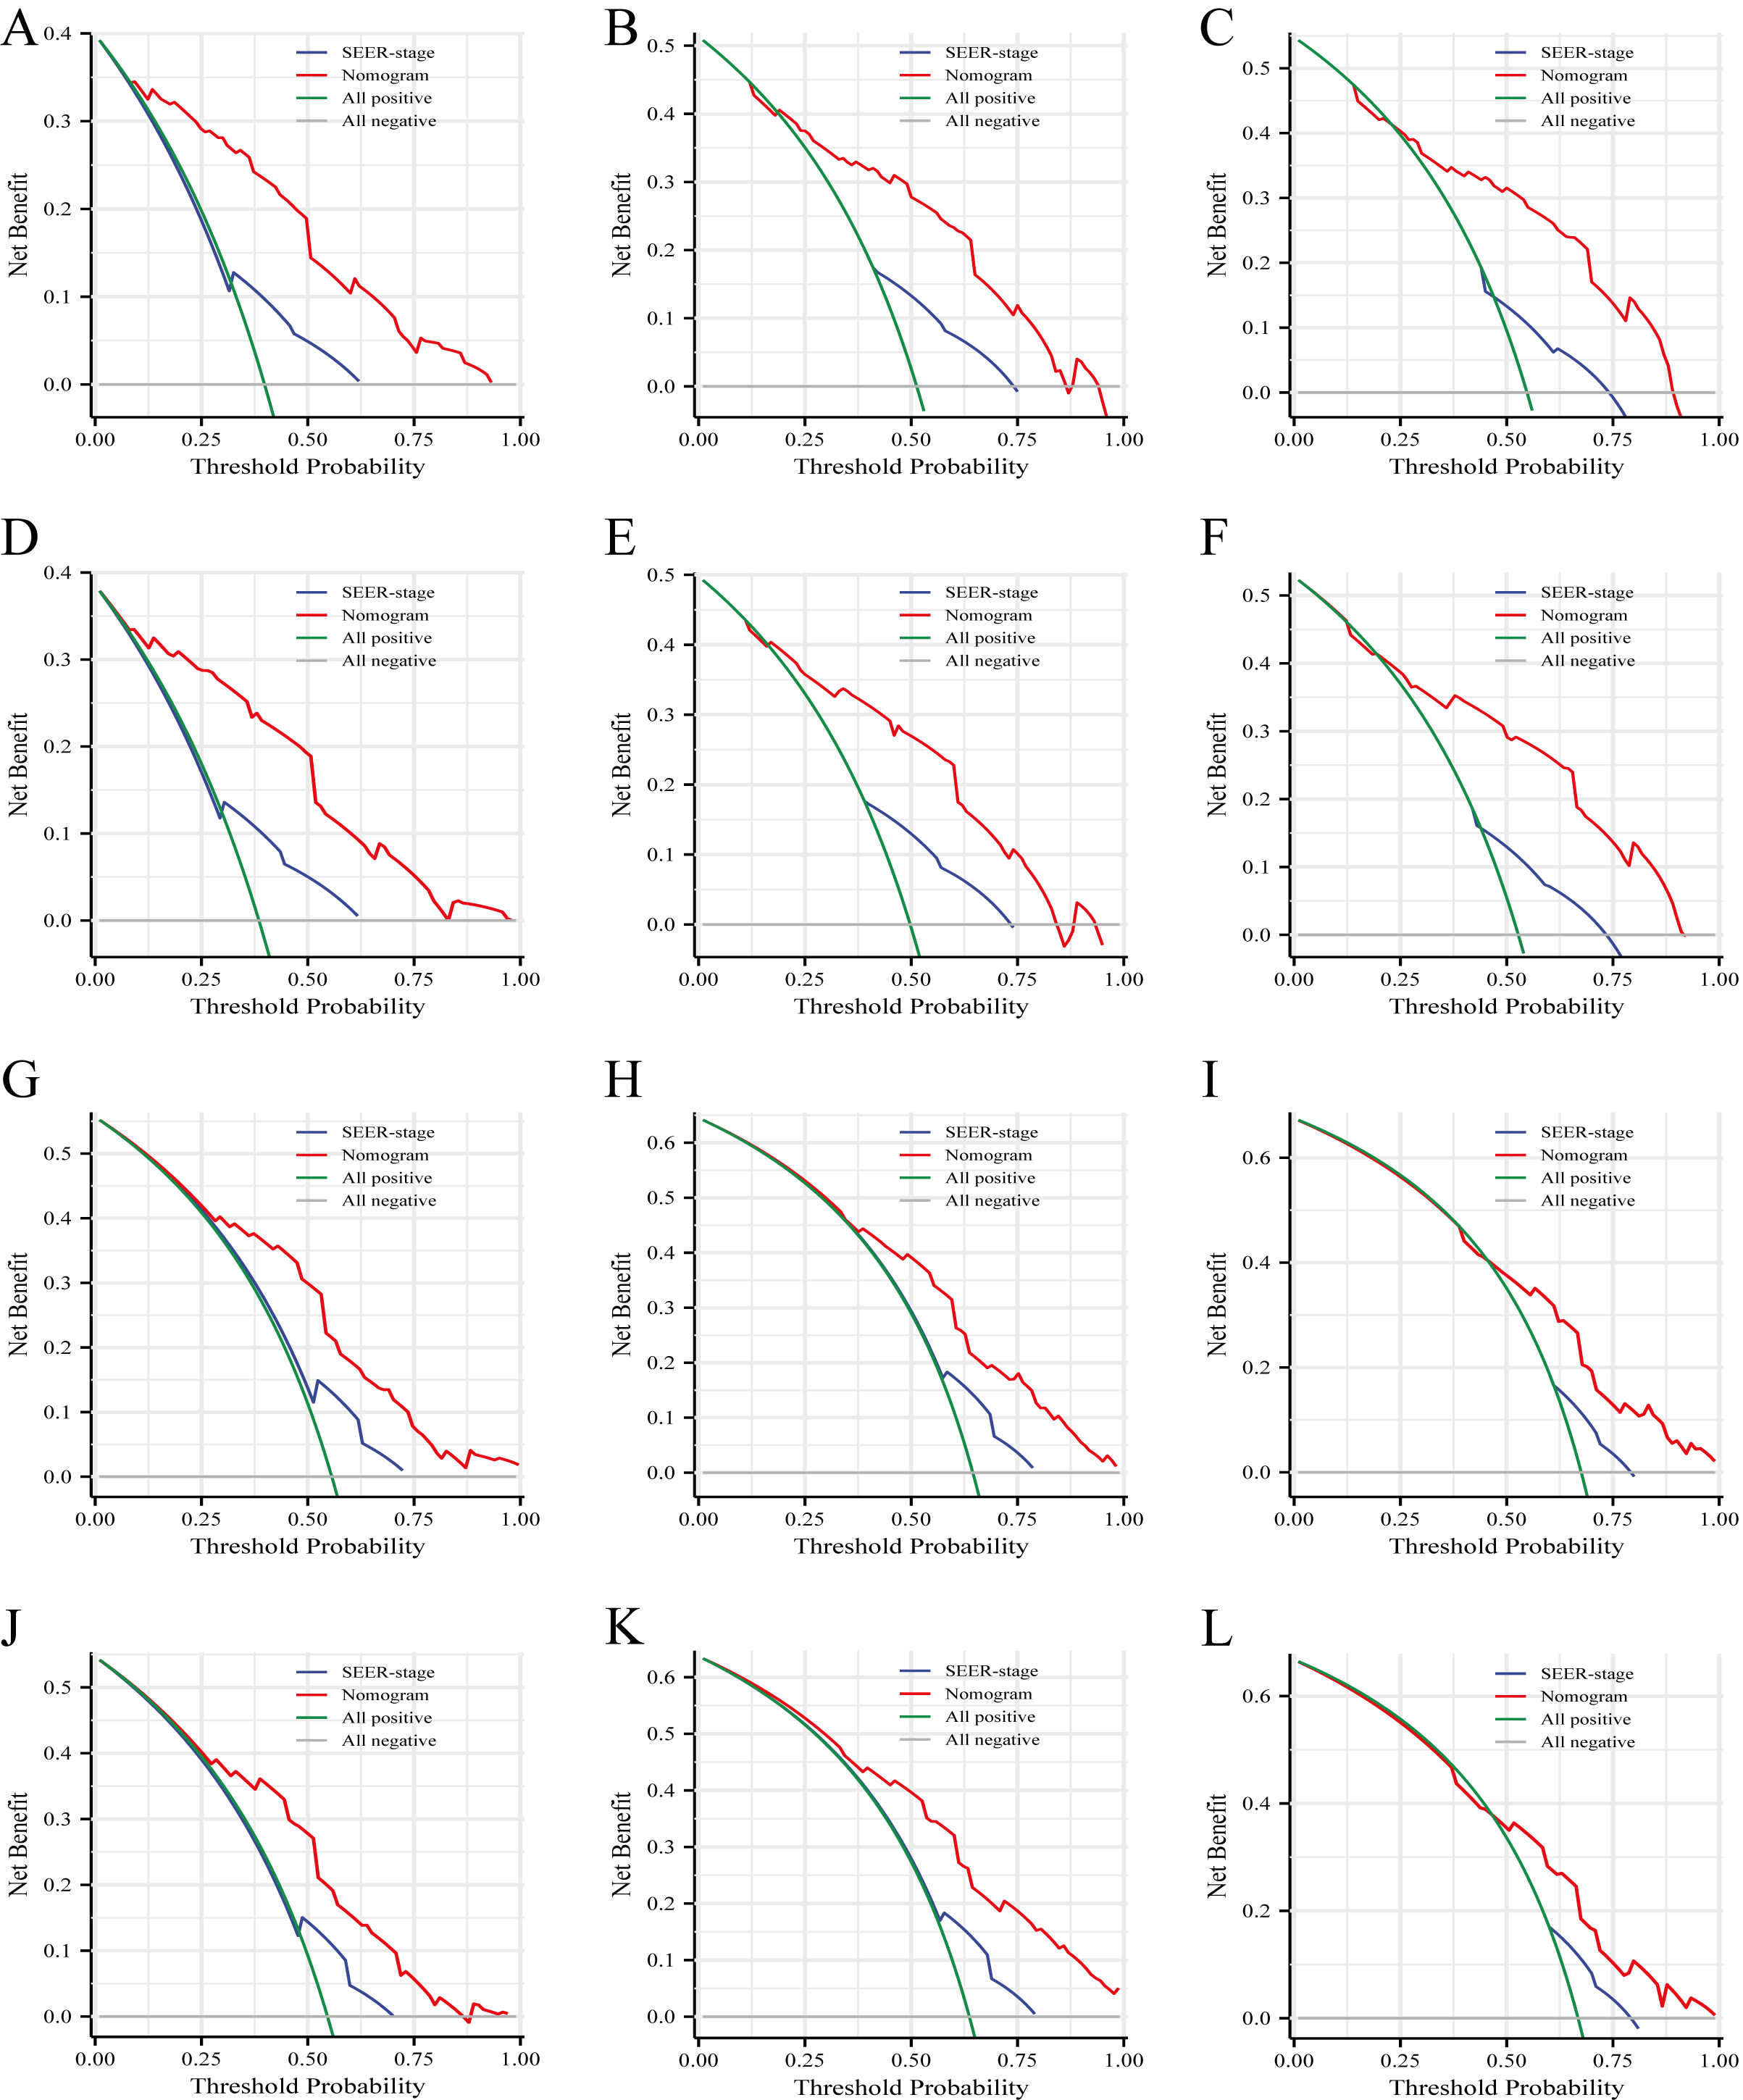


Supplementary Figure 4. The nomogram and the SEER-stage of the Decision curve analysis in the prediction of OS at the 1-year (A,D), 2-year (B,E) and 3-year (C,F) point in the training and validation groups. The prediction of CSS at the 1-year (G,J), 2-year (H,K) and 3-year (I,L) point in the training and validation groups.


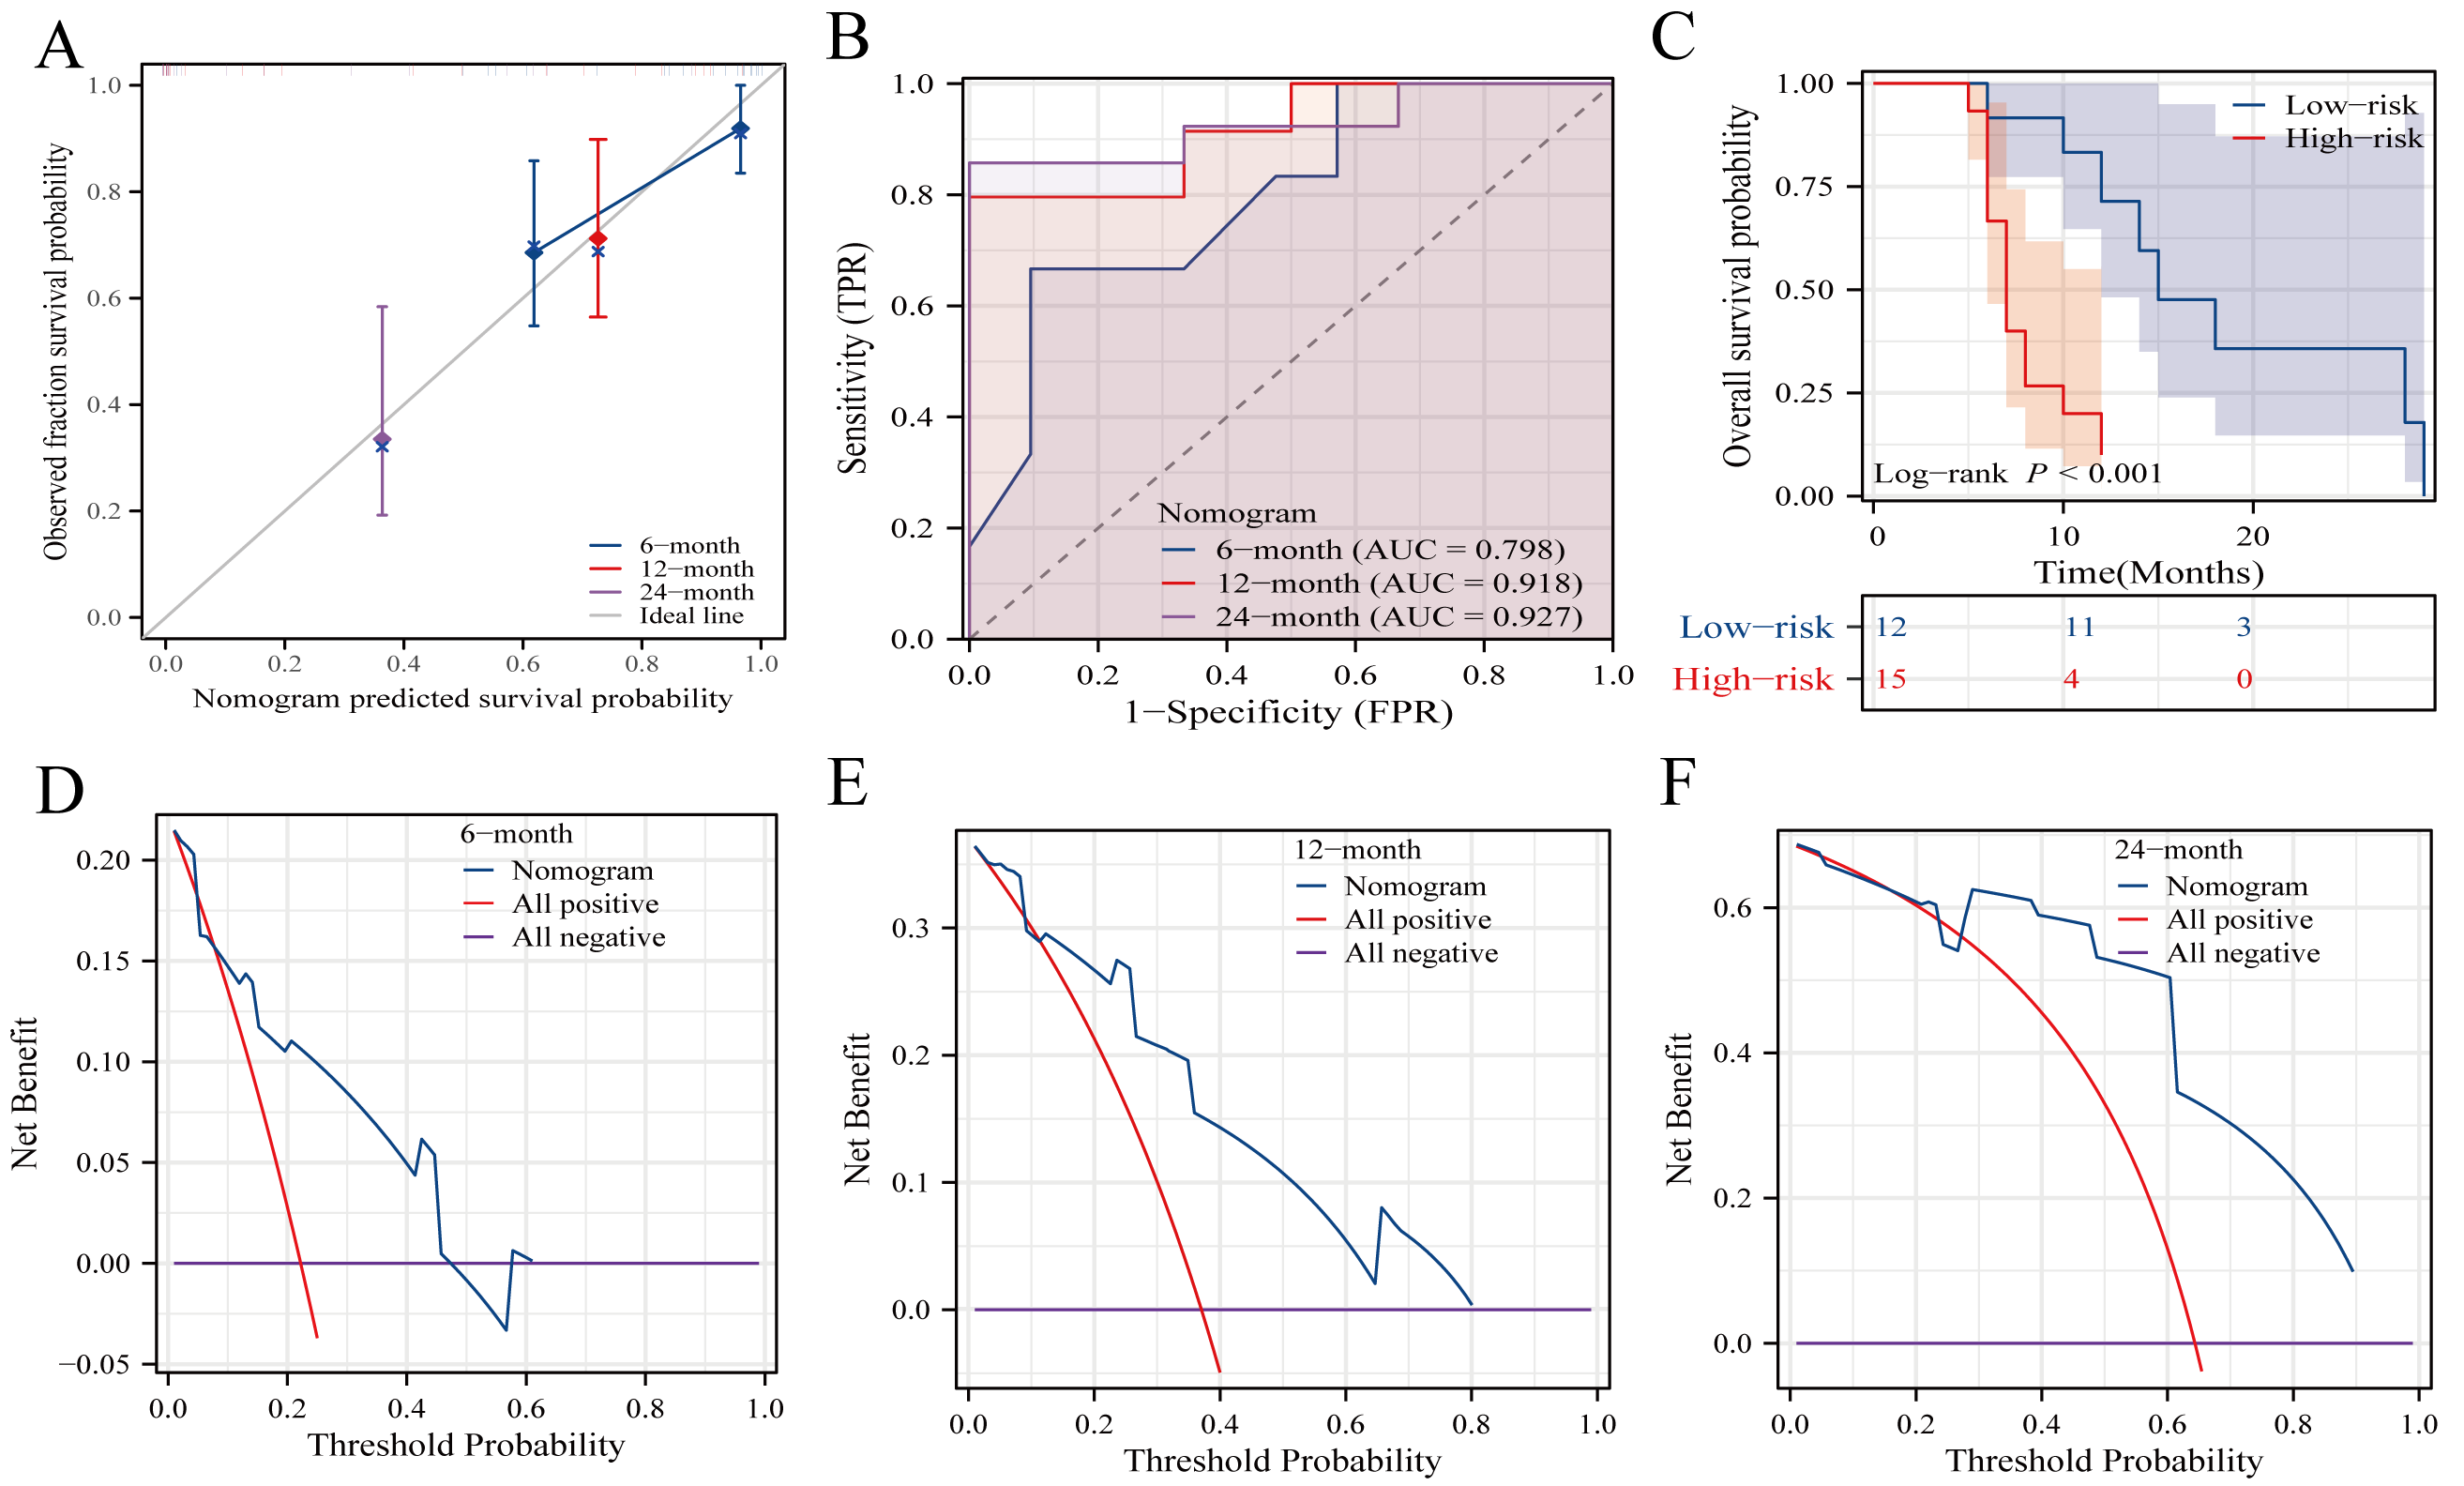


Supplementary Figure 5. The external validation of predictive models. (A) Calibration curves forecasting OS at 0.5-year, 1-year, and 2-year intervals. (B) Time-dependent ROC curve for OS. (C) Risk-stratification based on risk points derived from the model. (D-F) Decision curve analysis for OS prediction at 0.5-year (D), 1-year (E), and 2-year (F) milestones.

Supplementary Table 1**.** Characteristics of the AT/RT patients in the external validation group.

| **Characteristics** | **External validation group in Chongqing (n=27)  no.(%)** |
| --- | --- |
| **Median follow-up time** （Months, Range） | 22 (4.3-39.7) |
| **Median overall survival time** （Months, 95%CI） | 10 (5.8-14.2) |
| **Gender** |  |
| Male | 15 (55.6%) |
| Female | 12 (44.4%) |
| **Age** |  |
| <1 years | 6 (22.2%) |
| 1-3 years | 15 (55.6%) |
| >3 years | 6 (22.2%) |
| **Race** |  |
| White | 0 (0.0%) |
| Black | 0 (0.0%) |
| Others | 27 (100.0%) |
| **Grade** |  |
| Poorly/Undifferentiated | 20 (74.1%) |
| Unknown | 7 (25.9%) |
| **Primary Site** |  |
| Brain | 21 (77.8%) |
| Spinal cord | 6 (22.2%) |
| **T umor size** |  |
| <4cm/NOS | 10 (37.0%) |
| ≥4cm | 17 (63.0%) |
| **M stage** |  |
| M0 | 11 (40.7%) |
| M1 | 16 (59.3%) |
| **Surgery** |  |
| GTR/STR | 25 (92.6%) |
| Others | 2 (7.4%) |
| **Radiation** |  |
| No/Unknown | 23 (85.2%) |
| Yes | 4 (14.8%) |
| **Chemotherapy** |  |
| No/Unknown | 13 (48.1%) |
| Yes | 14 (51.9%) |

Supplementary Table 2.Propensity-matched score analysis of triple-therapy (SRC) with surgery plus radiotherapy/chemotherapy (SB/SC) in AT/RT.

|  | Unmatched | | *P value* | Matched | | *P value* |
| --- | --- | --- | --- | --- | --- | --- |
| Characteristics | SR/SC | SRC | SR/SC | SRC |
| N=124 | N=133 | N=124 | N=77 |
| **Years of diagnosis** |  |  | <0.001 |  |  | 0.113 |
| 2000-2009 | 58 (47%) | 93 (70%) |  | 66 (53%) | 32 (42%) |  |
| 2010-2019 | 66 (53%) | 40 (30%) |  | 58 (47%) | 45 (58%) |  |
| **Age** |  |  | <0.001 |  |  | 0.172 |
| <1 year | 56 (45%) | 25 (19%) |  | 56 (45%) | 25(32%) |  |
| 1-3 year | 52 (42%) | 65 (49%) |  | 52 (42%) | 42 (55%) |  |
| >3 year | 16 (13%) | 43 (32%) |  | 16 (13%) | 10 (13%) |  |
| **Gender** |  |  | 0.776 |  |  | 0.685 |
| Male | 64 (52%) | 71 (53%) |  | 64 (52%) | 42 (55%) |  |
| Female | 60 (48%) | 62 (47%) |  | 60 (48%) | 35 (45%) |  |
| **Race** |  |  | 0.478 |  |  | 0.893 |
| White | 93 (75%) | 108 (81%) |  | 93 (75%) | 60 (78%) |  |
| Black | 18 (15%) | 14 (11%) |  | 18 (15%) | 10 (13%) |  |
| Others | 13 (10%) | 11 (8.3%) |  | 13 (10%) | 7 (9.1%) |  |
| **Household income** |  |  | 0.568 |  |  | 0.213 |
| <75000$ | 88 (71%) | 90 (68%) |  | 88 (71%) | 48 (62%) |  |
| ≥75000$ | 36 (29%) | 43 (32%) |  | 36 (29%) | 29 (38%) |  |
| **Grade** |  |  | 0.529 |  |  | 0.982 |
| Unknown | 100 (81%) | 103 (77%) |  | 100 (81%) | 62 (81%) |  |
| III-IV | 24 (19%) | 30 (23%) |  | 24 (19%) | 15 (19%) |  |
| **Primary site** |  |  | 0.678 |  |  | 0.911 |
| Intracranial | 118 (95%) | 125 (94%) |  | 118 (95%) | 73 (95%) |  |
| Spinal cord | 6 (4.8%) | 8 (6.0%) |  | 6 (4.8%) | 4 (5.2%) |  |
| **Laterality** |  |  | 0.012 |  |  | 0.175 |
| Left | 21 (17%) | 22 (17%) |  | 21 (17%) | 13 (17%) |  |
| Right | 14 (11%) | 34 (26%) |  | 14 (11%) | 16 (21%) |  |
| Others | 89 (72%) | 77 (58%) |  | 89 (72%) | 48 (62%) |  |
| **Tumor size** |  |  | 0.045 |  |  | 0.461 |
| <4/NOS | 61 (49%) | 82 (62%) |  | 61 (49%) | 42 (55%) |  |
| ≥4cm | 63 (51%) | 51 (38%) |  | 63 (51%) | 35 (45%) |  |
| **SEER-stage** |  |  | 0.009 |  |  | 0.163 |
| Localized | 65 (52%) | 93 (70%) |  | 65 (52%) | 50 (65%) |  |
| Regional | 23 (19%) | 20 (15%) |  | 23 (19%) | 13 (17%) |  |
| Distant | 36 (29%) | 20 (15%) |  | 36 (29%) | 14 (18%) |  |
